# Supplementary material for: Asymmetric Non-Fullerene Small Molecule Acceptor with Unidirectional Non-Fused π-Bridge and Extended Terminal Group for High-Efficiency Organic Solar Cells
Source: MDPI journal article supplement (doi:10.3390/ijms231710079), 2022-09-03
Supplement: s1 [file s1]

## Supporting Information

### **Asymmetric Non-fullerene Small Molecule Acceptor with Unidirectional Non-fused $\pi$ -bridge and Extended Terminal Group for High-efficiency Organic Solar Cells**

*Kun Wang*<sup>1,\*†</sup>, *Qing Guo*<sup>2,3,†</sup>, *Zengkun Nie*<sup>1</sup>, *Huiyan Wang*<sup>1,2</sup>, *Jingshun Gao*<sup>1</sup>, *Jianqi Zhang*<sup>4</sup>, *Linfeng Yu*<sup>3</sup>, *Xia Guo*<sup>3,\*</sup> and *Maojie Zhang*<sup>3</sup>

<sup>1</sup> School of Materials and Chemical Engineering, Zhongyuan University of Technology, Zhengzhou 451191, China

<sup>2</sup> Henan Institute of Advanced Technology, Zhengzhou University, Zhengzhou 450003, China.

<sup>3</sup> Laboratory of Advanced Optoelectronic Materials, College of Chemistry, Chemical Engineering and Materials Science, Soochow University, Suzhou 215123, China

<sup>4</sup> CAS Key Laboratory of Nanosystem and Hierarchical Fabrication, CAS Center for Excellence in Nanoscience, National Center for Nanoscience and Technology, Beijing 100190, China

\* Correspondence: kwang@zut.edu.cn (K.W.); guoxia@suda.edu.cn (X.G.)

† Kun Wang and Qing Guo contributed equally to this work

## Experimental section

### Materials.

All chemicals and solvents were reagent grades and purchased from Alfa Aesar, J&K, and Aldrich, respectively. IDT-Sn [1], IDT-Th [2] and IDT-Th-CHO [2], was synthesized according to reported before. The molecular structure and synthetic route of IDT-TNIC is shown in **Scheme S1**, the detailed as follows:

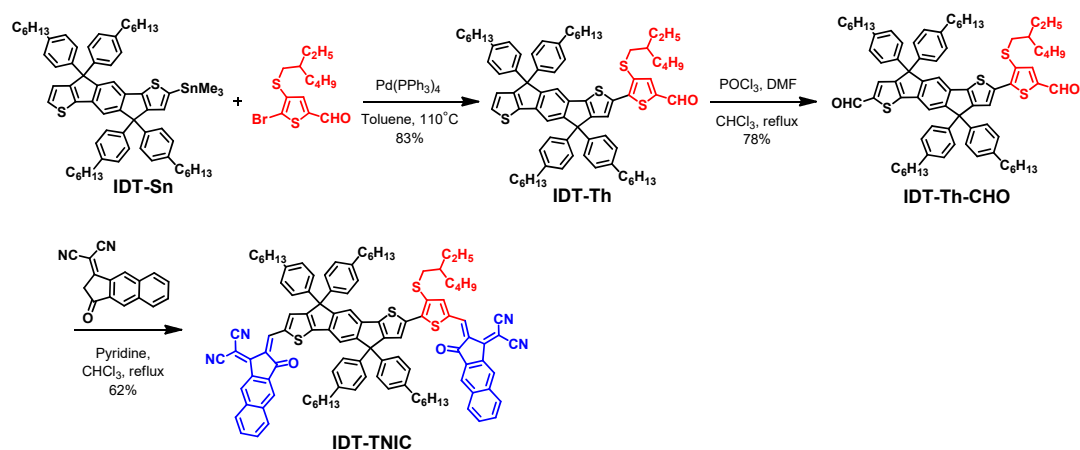

**Scheme S1.** The synthetic route and molecular structure of IDT-TNIC.

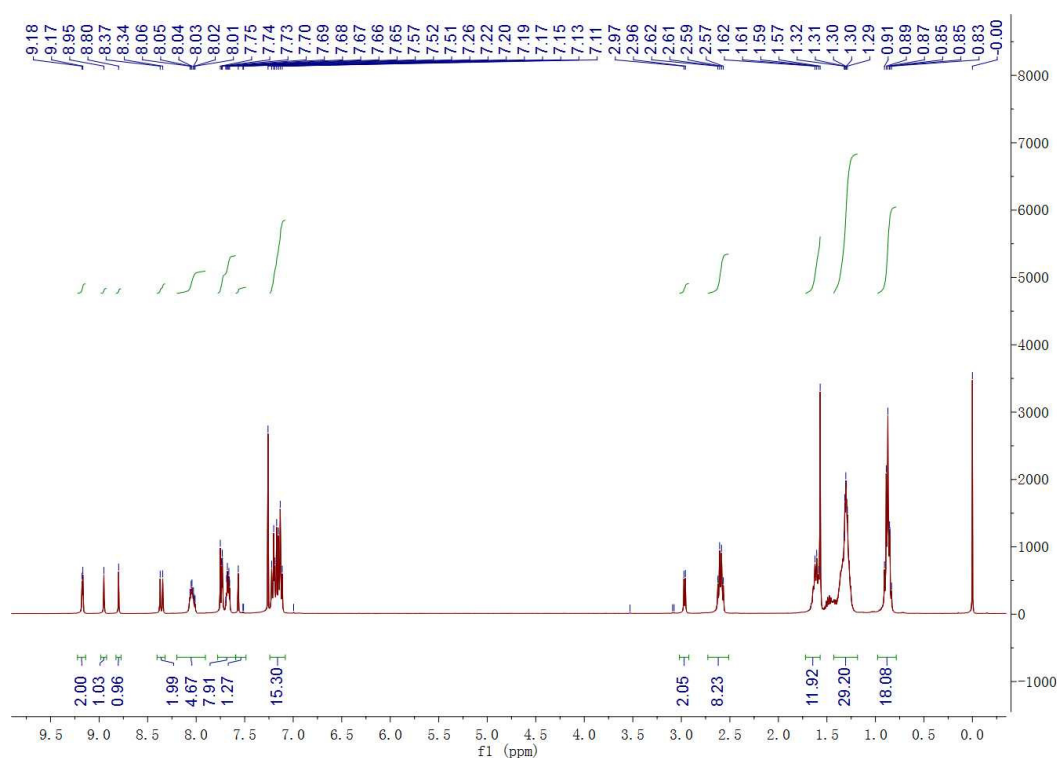

$^1\text{H}$  NMR of IDT-TNIC in  $\text{CDCl}_3$ .

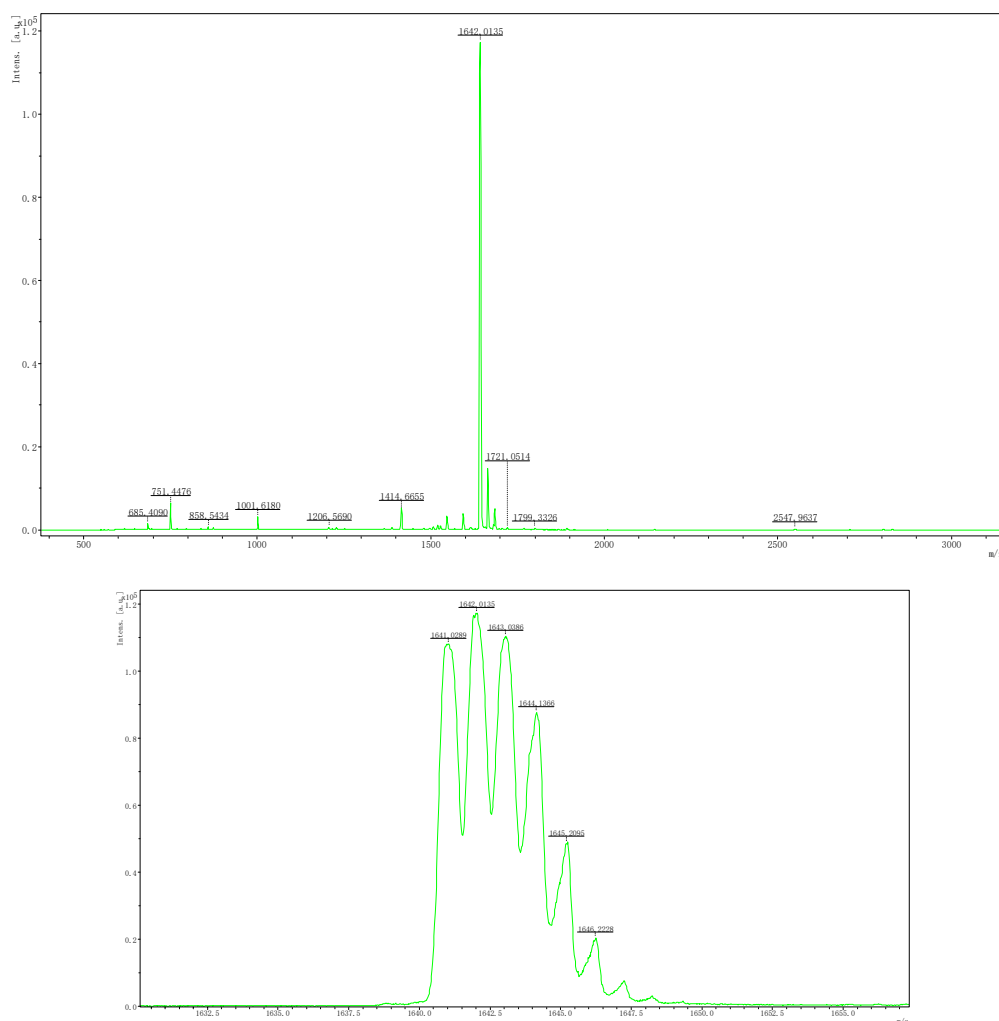

MALDI-TOF of IDT-TNIC

## Instruments and measurements

$^1\text{H}$  NMR and  $^{13}\text{C}$  NMR were measured in  $\text{CDCl}_3$  on Bruker AV 400 MHz FT-NMR spectrometer. MALDI-TOF was measured on ultrafleXtreme™ Mass spectrometer from Bruker Daltonics. UV-Vis absorption spectra were measured by an Agilent Carry-5000 UV-Vis spectrophotometer. The solubility of PBSF-A12, PBSF-D12 and PBDB-T-SF in different solution were calculated according to the method reported in the literature. <sup>[4]</sup> Electrochemical cyclic voltammetry (CV) was performed on a Zahner Zennium IM6 electrochemical workstation with a three-electrode system in  $0.1 \text{ mol L}^{-1}$   $\text{Bu}_4\text{NPF}_6$  acetonitrile solutions at a scan rate of  $50 \text{ mV s}^{-1}$ . Elemental analysis was carried out on a flash EA1112 analyzer. The molecular weight of the polymer was measured by the GPC method with polystyrene as the standard and 1,2,4-trichlorobenzene as the solvent at  $160^\circ\text{C}$  using Agilent Technologies

PL-GPC220. Thermogravimetric analysis (TGA) was measured on Discovery TGA from TA Instruments Inc. at a heating rate of  $10\text{ }^{\circ}\text{C min}^{-1}$  under a nitrogen atmosphere. Differential scanning calorimetry (DSC) was performed on a TA DSC Q-200 at a scan rate of  $10\text{ }^{\circ}\text{C min}^{-1}$  under nitrogen atmosphere. X-Ray Diffraction (XRD) was performed on a X'Pert-ProMRD. Photoluminescence (PL) spectra were performed on an Edinburgh Instrument FLS 980. The atomic force microscopy (AFM) measurement was carried out on a Dimension 3100 (Veeco) Atomic Force Microscope in the tapping mode. Transmission electron microscopy (TEM) was performed on a Tecnai G2 F20 S-TWIN instrument at 200 kV accelerating voltage. The GWAXS measurements were performed at beamline 7.3.3 at the Advanced Light Source (ALS). The current-voltage ( $J$ - $V$ ) characteristics of the devices were measured on a Keithley 2450 Source Measure Unit. The power conversion efficiency of the OSCs was measured under an illumination of AM 1.5G ( $100\text{ mW cm}^{-2}$ ) using a SS-F5-3A (Enli Technology Co. Ltd.) solar simulator (AAA grade, 50 mm x 50 mm photobeam size). The EQE was measured by Solar Cell Spectral Response Measurement System QE-R3011 (Enli Technology Co. Ltd.). The light intensity at each wavelength was calibrated with a standard single-crystal Si photovoltaic cell.

### **Mobility measurement**

The mobility was measured by the space charge limited current (SCLC) method by a hole-only device with a structure of ITO/PEDOT:PSS/PBDB-T or PBDB-T:**IDT-TNIC**/MnO<sub>3</sub>(10 nm)/Al(100 nm) or an electron-only device with a structure of ITO/ZnO-NP/PBDB-T:**IDT-TNIC** or **IDT-TNIC** /PFN-Br/Al(100 nm) and estimated through the Mott-Gurney equation. For the hole-only devices, SCLC is described by  $J \cong (9/8) \varepsilon \varepsilon_0 \mu_0 V^2 \exp(0.89\sqrt{V/E_0 L})/L^3$ , Where  $\varepsilon$  is the dielectric constant of PM6:Acceptors,  $\varepsilon_0$  is the permittivity of the vacuum,  $\mu_0$  is the zero-field mobility,  $E_0$  is the characteristic field,  $J$  is the current density,  $L$  is the thickness of the films,  $V = V_{\text{appl}} - V_{\text{bi}}$ ,  $V_{\text{appl}}$  is the applied potential, and  $V_{\text{bi}}$  is the built-in potential which results from the difference in the work function of the anode and the cathode (in this device structure,  $V_{\text{bi}} = 0.2\text{ V}$ ). For the electron-only devices, SCLC is

described by  $J = \frac{8}{9} \epsilon_r \epsilon_0 \mu_e \frac{V^2}{L^3}$ , where  $J$  is the current density,  $\epsilon_r$  is the dielectric constant of IDT-TNIC,  $\epsilon_0$  is the permittivity of the vacuum,  $L$  is the thickness of the blend film,  $V = V_{\text{appl}} - V_{\text{bi}}$ ,  $V_{\text{appl}}$  is the applied potential, and  $V_{\text{bi}}$  is the built-in potential which results from the difference in the work function of the anode and the cathode (in this device structure,  $V_{\text{bi}} = 0$  V).

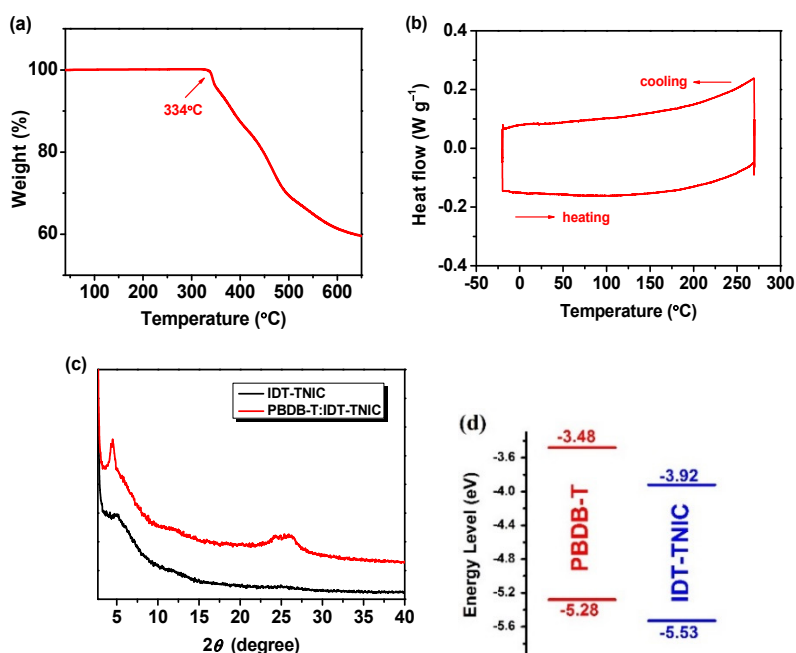

**Figure S1.** (a) TGA and (b) DSC of IDT-TNIC, (c) XRD of IDT-TNIC pure film and PBDB-T:IDT-TNIC blend film, (d) Energy level diagram of PBDB-T and IDT-TNIC.

**Table S1.** Optical and electrochemical properties of IDT-TNIC.

| Material            | UV-vis in solution          |                              | UV-vis in solid film        |                              |                                  | CV        |           |                                 | Dipole moment (Debye) <sup>b)</sup> |
|---------------------|-----------------------------|------------------------------|-----------------------------|------------------------------|----------------------------------|-----------|-----------|---------------------------------|-------------------------------------|
|                     | $\lambda_{\text{max}}$ (nm) | $\lambda_{\text{edge}}$ (nm) | $\lambda_{\text{max}}$ (nm) | $\lambda_{\text{edge}}$ (nm) | $E_{\text{g}}^{\text{opt}}$ (eV) | HOMO (eV) | LUMO (eV) | $E_{\text{g}}^{\text{cv}}$ (eV) |                                     |
| IDT-TNIC            | 727                         | 809                          | 755                         | 862                          | 1.44                             | -5.53     | -3.92     | 1.61                            | 4.30                                |
| IDT-N <sup>a)</sup> | 687                         | 725                          | 727                         | 784                          | 1.58                             | -5.74     | -4.08     | 1.66                            | 0.00 [3]                            |

<sup>a)</sup> Reported in literature. <sup>b)</sup> Obtained from gaussian theoretical simulation

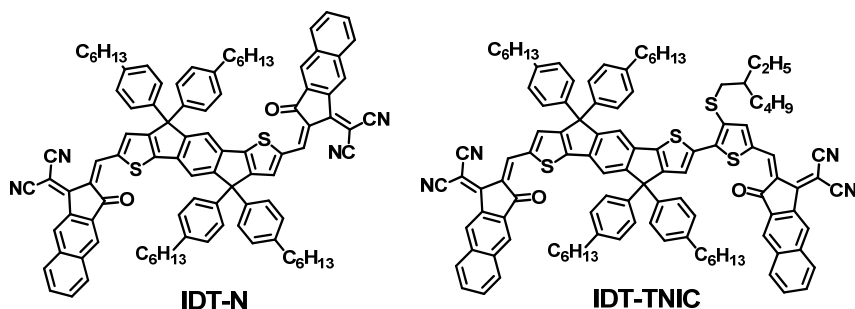

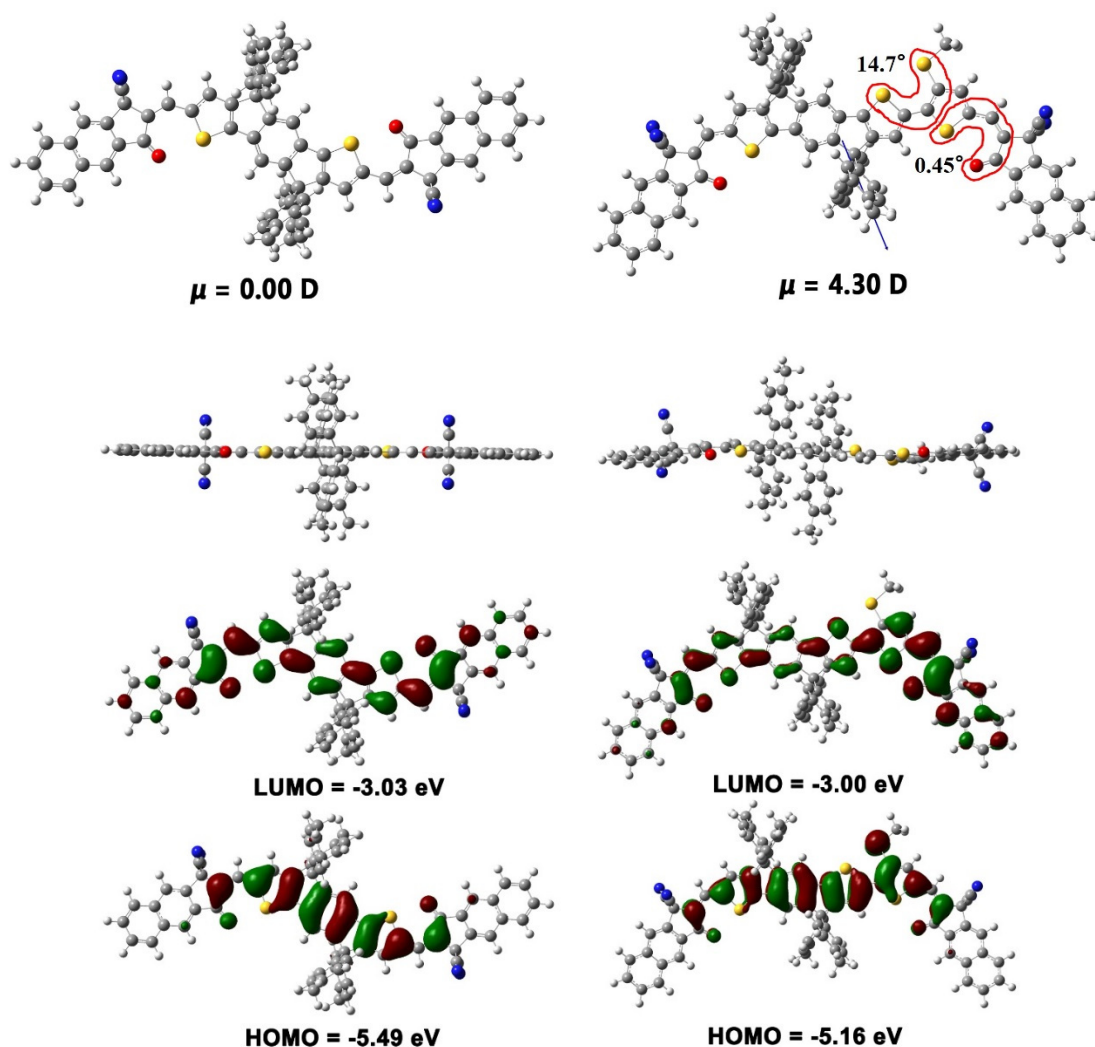

**Figure S2.** Chemical structures of IDT-N (left) and IDT-TNIC (right), and the corresponding molecular conformations and the electron cloud distribution of frontier molecular orbital via DFT-based theoretical calculations at the B3LYP/6-31G(d,p) level. (All side chains are simplified as the methyl groups.)

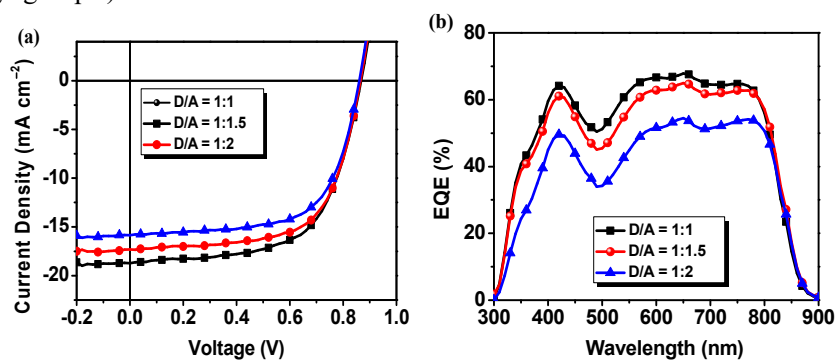

**Figure S3.** (a)  $J$ - $V$  plots of PBDT-T:IDT-TNIC-based OSCs with different D/A under the illumination of AM 1.5G,  $100 \text{ mW cm}^{-2}$ , (b) The corresponding EQE curves of the OSCs.

**Table S2.** Photovoltaic parameters of PBDT-T:IDT-TNIC-based OSCs with different D/A under the illumination of AM 1.5G,  $100 \text{ mW cm}^{-2}$ .

| PBDB-T:IDT-TNIC | $V_{oc}$<br>(V) | $J_{sc}$<br>(mA cm <sup>-2</sup> ) | Cal. $J_{sc}$<br>(mA cm <sup>-2</sup> ) | FF<br>(%) | PCE<br>(%) |
|-----------------|-----------------|------------------------------------|-----------------------------------------|-----------|------------|
| 1:1             | 0.868           | 18.73                              | 18.10                                   | 62.5      | 10.19      |
| 1:1.5           | 0.865           | 17.32                              | 17.30                                   | 64.8      | 9.72       |
| 1:2             | 0.861           | 15.86                              | 14.27                                   | 65.0      | 8.87       |

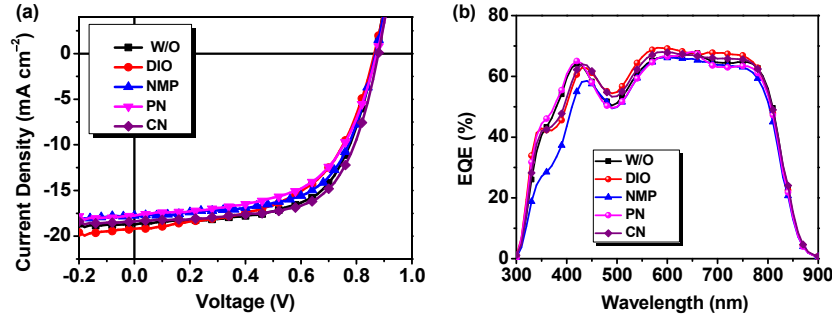

**Figure S4.** (a)  $J$ - $V$  plots of PBDB-T:IDT-TNIC-based OSCs (1:1, w/w) with different additive under the illumination of AM 1.5G, 100 mW cm<sup>-2</sup>, (b) The corresponding EQE curves of the OSCs.

**Table S3.** Photovoltaic parameters of PBDB-T:IDT-TNIC-based OSCs (1:1, w/w) with different additive under the illumination of AM 1.5G, 100 mW cm<sup>-2</sup>.

| PBDB-T:IDT-TNIC   | $V_{oc}$<br>(V) | $J_{sc}$<br>(mA cm <sup>-2</sup> ) | Cal. $J_{sc}$<br>(mA cm <sup>-2</sup> ) | FF<br>(%) | PCE<br>(%) |
|-------------------|-----------------|------------------------------------|-----------------------------------------|-----------|------------|
| W/O               | 0.863           | 18.84                              | 18.10                                   | 61.6      | 10.19      |
| DIO <sup>a)</sup> | 0.865           | 19.20                              | 18.54                                   | 55.2      | 9.32       |
| NMP <sup>b)</sup> | 0.869           | 17.76                              | 17.32                                   | 62.3      | 9.79       |
| PN <sup>c)</sup>  | 0.873           | 17.76                              | 17.85                                   | 58.0      | 9.16       |
| CN <sup>d)</sup>  | 0.879           | 18.41                              | 18.34                                   | 64.6      | 10.46      |

<sup>a)</sup> DIO is an abbreviation of 1,8-Diiodooctane. <sup>b)</sup> NMP is an abbreviation of N-Methylpyrrolidone. <sup>c)</sup> PN is an abbreviation of 1-Phenylnaphthalene. <sup>d)</sup> CN is an abbreviation of 1-Chloronaphthalene.

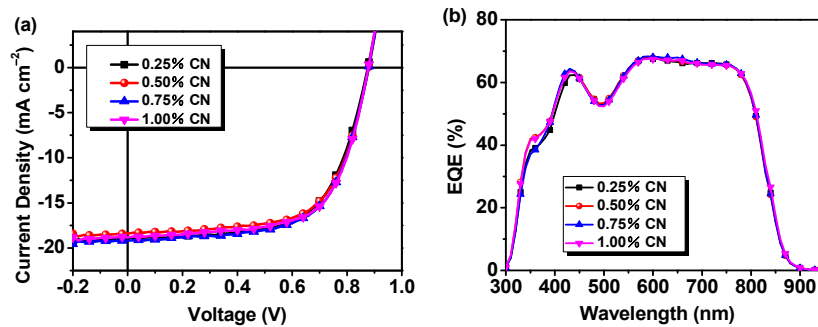

**Figure S5.** (a)  $J$ - $V$  plots of PBDB-T:IDT-TNIC-based OSCs (1:1, w/w) with different CN contents under the illumination of AM 1.5G, 100 mW cm<sup>-2</sup>, (b) The corresponding EQE curves of the OSCs.

**Table S4.** Photovoltaic parameters of PBDB-T:IDT-TNIC-based OSCs (1:1, w/w) with different CN contents under the illumination of AM 1.5G, 100 mW cm<sup>-2</sup>.

| PBDB-T:IDT-TNIC | $V_{oc}$<br>(V) | $J_{sc}$<br>(mA cm <sup>-2</sup> ) | Cal. $J_{sc}$<br>(mA cm <sup>-2</sup> ) | FF<br>(%) | PCE<br>(%) |
|-----------------|-----------------|------------------------------------|-----------------------------------------|-----------|------------|
| 0.25% CN        | 0.876           | 18.98                              | 18.25                                   | 63.6      | 10.58      |
| 0.50% CN        | 0.879           | 18.41                              | 18.34                                   | 64.6      | 10.46      |
| 0.75% CN        | 0.879           | 19.20                              | 18.37                                   | 64.2      | 10.84      |
| 1.00% CN        | 0.878           | 18.81                              | 18.35                                   | 65.3      | 10.79      |

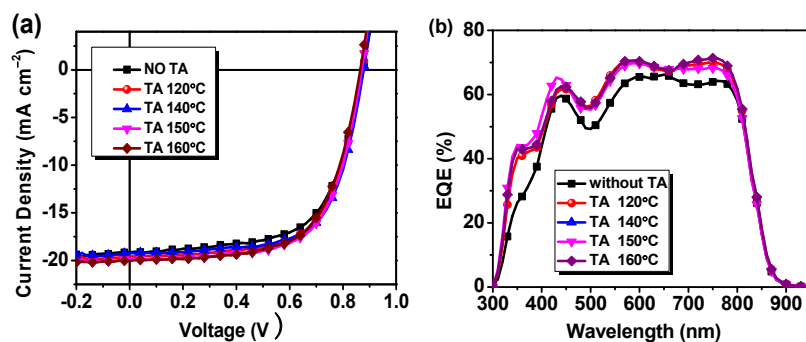

**Figure S6.** (a)  $J$ - $V$  plots of PBDB-T:IDT-TNIC-based OSCs (1:1, w/w) with different TA temperature for 10 min, 0.75% CN as additive under the illumination of AM 1.5G, 100 mW cm<sup>-2</sup>, (b) The corresponding EQE curves of the OSCs.

**Table S5.** Photovoltaic parameters of PBDB-T:IDT-TNIC-based OSCs (1:1, w/w) with different TA temperature under the illumination of AM 1.5G, 100 mW cm<sup>-2</sup>.

| PBDB-T:IDT-TNIC    | $V_{oc}$<br>(V) | $J_{sc}$<br>(mA cm <sup>-2</sup> ) | Cal. $J_{sc}$<br>(mA cm <sup>-2</sup> ) | FF<br>(%) | PCE<br>(%) |
|--------------------|-----------------|------------------------------------|-----------------------------------------|-----------|------------|
| NO TA              | 0.879           | 19.20                              | 17.58                                   | 64.2      | 10.84      |
| 0.75% CN, TA 10min | 0.874           | 19.56                              | 19.10                                   | 64.9      | 11.04      |
| TA 120 °C          | 0.878           | 19.21                              | 18.77                                   | 66.9      | 11.21      |
| TA 140 °C          | 0.875           | 19.23                              | 18.93                                   | 66.3      | 11.22      |
| TA 150 °C          | 0.865           | 20.04                              | 19.25                                   | 64.2      | 11.06      |
| TA 160 °C          |                 |                                    |                                         |           |            |

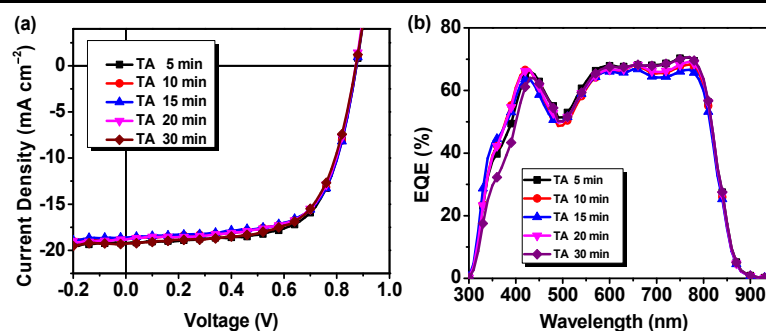

**Figure S7.** (a)  $J$ - $V$  plots of PBDB-T:IDT-TNIC-based OSCs (1:1, w/w) with different TA time, 0.75% CN as additive and TA treatment at 150 °C under the illumination of AM 1.5G, 100 mW cm<sup>-2</sup>, (b) The corresponding EQE curves of the OSCs.

**Table S6.** Photovoltaic parameters of PBDB-T:IDT-TNIC-based OSCs (1:1, w/w) with different TA time, 0.75% CN as additive and TA treatment at 150 °C under the illumination of AM 1.5G,

100 mW cm<sup>-2</sup>.

| PBDB-T:IDT-TNIC       |        | $V_{oc}$<br>(V) | $J_{sc}$<br>(mA cm <sup>-2</sup> ) | Cal. $J_{sc}$<br>(mA cm <sup>-2</sup> ) | FF<br>(%) | PCE<br>(%) |
|-----------------------|--------|-----------------|------------------------------------|-----------------------------------------|-----------|------------|
| 0.75% CN<br>TA 150 °C | 5 min  | 0.871           | 19.85                              | 18.86                                   | 65.9      | 11.32      |
|                       | 10 min | 0.875           | 19.23                              | 18.41                                   | 66.3      | 11.22      |
|                       | 15 min | 0.875           | 18.62                              | 18.14                                   | 67.0      | 10.97      |
|                       | 20 min | 0.872           | 18.84                              | 18.57                                   | 66.2      | 10.93      |
|                       | 30 min | 0.873           | 19.27                              | 18.63                                   | 65.0      | 10.99      |

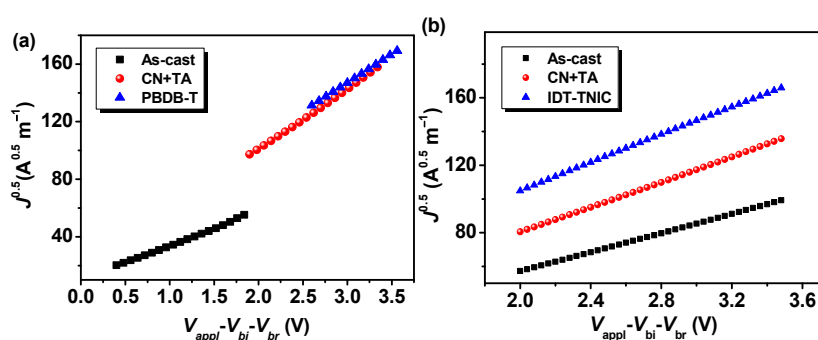

**Figure S8.** The  $J^{0.5}$ - $V$  plots for calculations of the hole-only (a) and electron-only (b) mobilities of PBDB-T:IDT-TNIC-based devices.

**Table S7.** Hole and electron mobilities of PBDB-T:IDT-TNIC-based devices measured by the SCLC method.

| Materials        | Conditions | $\mu_h$ (cm <sup>-2</sup> V <sup>-1</sup> s <sup>-1</sup> ) | $\mu_e$ (cm <sup>-2</sup> V <sup>-1</sup> s <sup>-1</sup> ) | $\mu_h/\mu_e$ |
|------------------|------------|-------------------------------------------------------------|-------------------------------------------------------------|---------------|
| PBDB-T           | Pure film  | $3.91 \times 10^{-4}$                                       | --                                                          | --            |
| IDT-TNIC         | Pure film  | --                                                          | $2.36 \times 10^{-4}$                                       | --            |
| PBDB-T:IDT-TNIC  | As-cast    | $2.30 \times 10^{-4}$                                       | $1.73 \times 10^{-4}$                                       | 1.33          |
| PBDB-T:IDT-TNIC  | CN+TA      | $3.63 \times 10^{-4}$                                       | $3.19 \times 10^{-4}$                                       | 1.14          |
| IDT-N [2]        | Pure film  | --                                                          | $1.09 \times 10^{-4}$                                       | --            |
| PBDB-T:IDT-N [2] | CN+TA      | $4.57 \times 10^{-4}$                                       | $2.87 \times 10^{-4}$                                       | 1.59          |

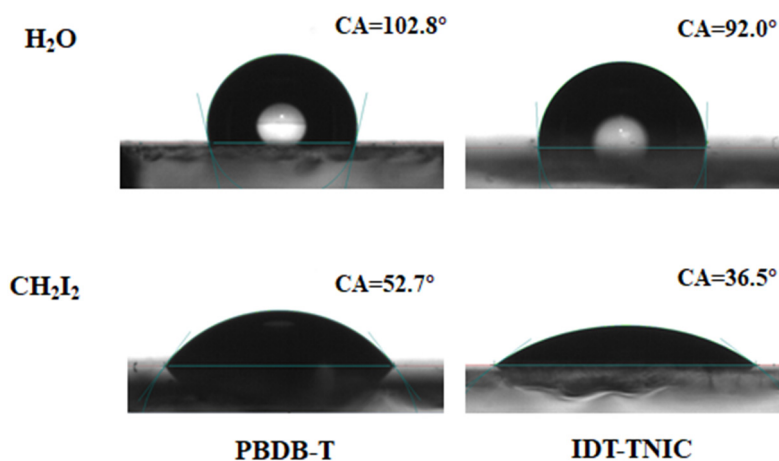

**Figure S9.** Contact angle images of neat PBDB-T and IDT-TNIC films with water and diiodomethane droplet on top.

**Table S8.** Summary of surface free energy and soluble parameters of neat PBDB-T and IDT-TNIC films calculated from contact angles measurement.

| Donor  | $\gamma_{Donor}$<br>(mN m <sup>-1</sup> ) | Acceptor | $\gamma_{Acceptor}$<br>(mN m <sup>-1</sup> ) | $\chi^{D-A}$       |
|--------|-------------------------------------------|----------|----------------------------------------------|--------------------|
| PBDB-T | 34.33                                     | IDT-TNIC | 43.66                                        | 0.56 <sup>a)</sup> |

<sup>a)</sup>  $\chi$  value was calculated according to Flory–Huggins model of  $\chi = (\sqrt{\gamma^D} - \sqrt{\gamma^A})^2$  [4,5].

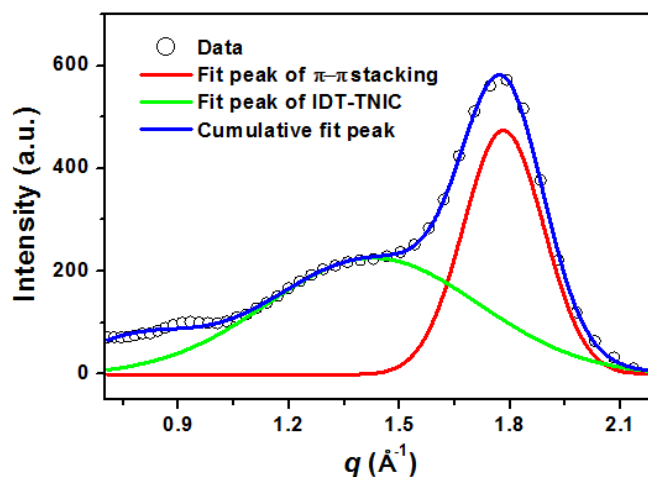

**Figure S10.** An example of Gaussian fitting for out-of-plane cut. The  $\pi$ - $\pi$  stacking distance and the FWHM of the  $\pi$ - $\pi$  stacking peak (010) were obtained from the fitting.

**Table S9.** GIWAXS test performance parameters of IDT-TNIC pure film and PBDB-T: IDT-TNIC blend film under optimal conditions

| in plane (100)                 |      |           |                |  | out of plane (010)             |      |           |                |
|--------------------------------|------|-----------|----------------|--|--------------------------------|------|-----------|----------------|
| location<br>(Å <sup>-1</sup> ) | FWHM | CL<br>(Å) | d-space<br>(Å) |  | location<br>(Å <sup>-1</sup> ) | FWHM | CL<br>(Å) | d-space<br>(Å) |

|                             |      |      |       |       |      |      |       |      |
|-----------------------------|------|------|-------|-------|------|------|-------|------|
| <b>IDT-TNIC</b>             | 0.31 | 0.15 | 37.68 | 20.26 | 1.78 | 0.25 | 22.61 | 3.53 |
| <b>PBDB-T:<br/>IDT-TNIC</b> | 0.30 | 0.04 | 141.3 | 20.93 | 1.77 | 0.26 | 21.74 | 3.55 |

## Reference

- [1] Demadrille, R.; Egrevé, S. (FR); Kervella, Y.; Verand, S. (FR). Organic colourant and uses thereof in photovoltaic cells. (P) . US 2014/0290748 A1. 2014-10-02.
- [2] Lin, J.; Guo, Q.; Liu, Q.; Lv, J.; Liang, H.; Wang, Y.; Zhu, L.; Liu, F.; Guo, X.; Zhang, M. A noncovalently fused-ring asymmetric electron acceptor enables efficient organic solar cells. *Chin. J. Chem.* **2021**, *39*, 2685–2691. <https://doi.org/10.1002/cjoc.202100323>.
- [3] Li, R.; Liu, G.; Xiao, M.; Yang, X.; Liu, X.; Wang, Z.; Ying, L.; Huang, F.; Cao, Y. Non-fullerene acceptors based on fused-ring oligomers for efficient polymer solar cells via complementary light-absorption. *J. Mater. Chem. A* **2017**, *5*, 23926–23936. <https://doi.org/10.1039/C7TA06631G>.
- [4] Leman, D.; Kelly, M.A.; Ness, S.; Engmann, S.; Herzing, A.; Snyder, C.; Ro, H.W.; Kline, R.J.; DeLongchamp, D.M.; Richter, L.J. In situ characterization of polymer–fullerene bilayer stability, *Macromolecules* **2015**, *48*, 383–392. <https://doi.org/10.1021/ma5021227>.
- [5] Xu, X.; Li, Y.; Peng, Q. Recent advances in morphology optimizations towards highly efficient ternary organic solar cells, *Nano Select* **2020**, *1*, 30–58. <https://doi.org/10.1002/nano.202000012>.
